# Supplementary material for: Fine-tuning of microglia polarization prevents diabetes-associated cerebral atherosclerosis
Source: PubMed Central journal article supplement (PMC9353938; doi:10.3389/fimmu.2022.948457), 2022-07-22
Supplement: Image_1.pdf [file Image_1.pdf]

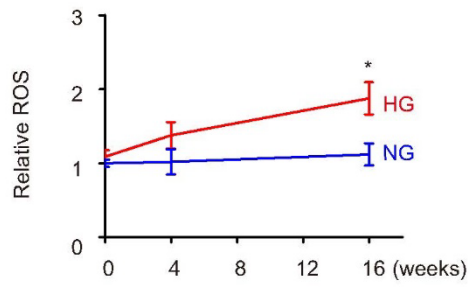

**Supplementary Figure 1: Hyperglycemia progressively induces microglia polarization likely to M2c**

(A-L) The polarization-related genes were examined in HMC3 microglia cultured in normal glucose (2.8 mmol/l) or high glucose (16.7mmol/l) in vitro at the start of the culture, 4 weeks' culture and 16 weeks' culture. ELISA comparison of expression levels of ROS. \*p<0.05. N=5.
